# Supplementary material for: IMPROvER: the Integral Membrane Protein Stability Selector
Source: PubMed Central journal article supplement (PMC7495477; doi:10.1038/s41598-020-71744-x), 2020-09-16
Supplement: 41598_2020_71744_MOESM1_ESM.pdf [file 41598_2020_71744_MOESM1_ESM.pdf]

# IMPROvER: The Integral Membrane Protein Stability Selector Supplementary Information

**Steven P.D. Harborne<sup>1,2,\*†</sup>, Jannik Strauss<sup>1,†</sup>, Jessica C. Boakes<sup>1,†</sup>, Danielle L. Wright<sup>1</sup>,  
James G. Henderson<sup>1</sup>, Jacques Boivineau<sup>3</sup>, Veli-Pekka Jaakola<sup>4</sup>, and Adrian  
Goldman<sup>1,5,\*</sup>**

<sup>1</sup>Astbury Centre for Structural and Molecular Biology, University of Leeds, UK

<sup>2</sup>Peak Proteins, BioHub, Alderley Park, Macclesfield, UK

<sup>3</sup>Novartis Institutes for Biomedical Research, Chemical Biology and Therapeutics, Virchow 16, Basel, Switzerland

<sup>4</sup>Confo Therapeutics, Technologiepark 94, 9052 Zwijnaarde, Belgium

<sup>5</sup>MIBS, Biological and Environmental Sciences, University of Helsinki, Finland

---

\*Corresponding authors: [steven.harborne@peakproteins.com](mailto:steven.harborne@peakproteins.com) and [a.goldman@leeds.ac.uk](mailto:a.goldman@leeds.ac.uk)

†these authors contributed equally

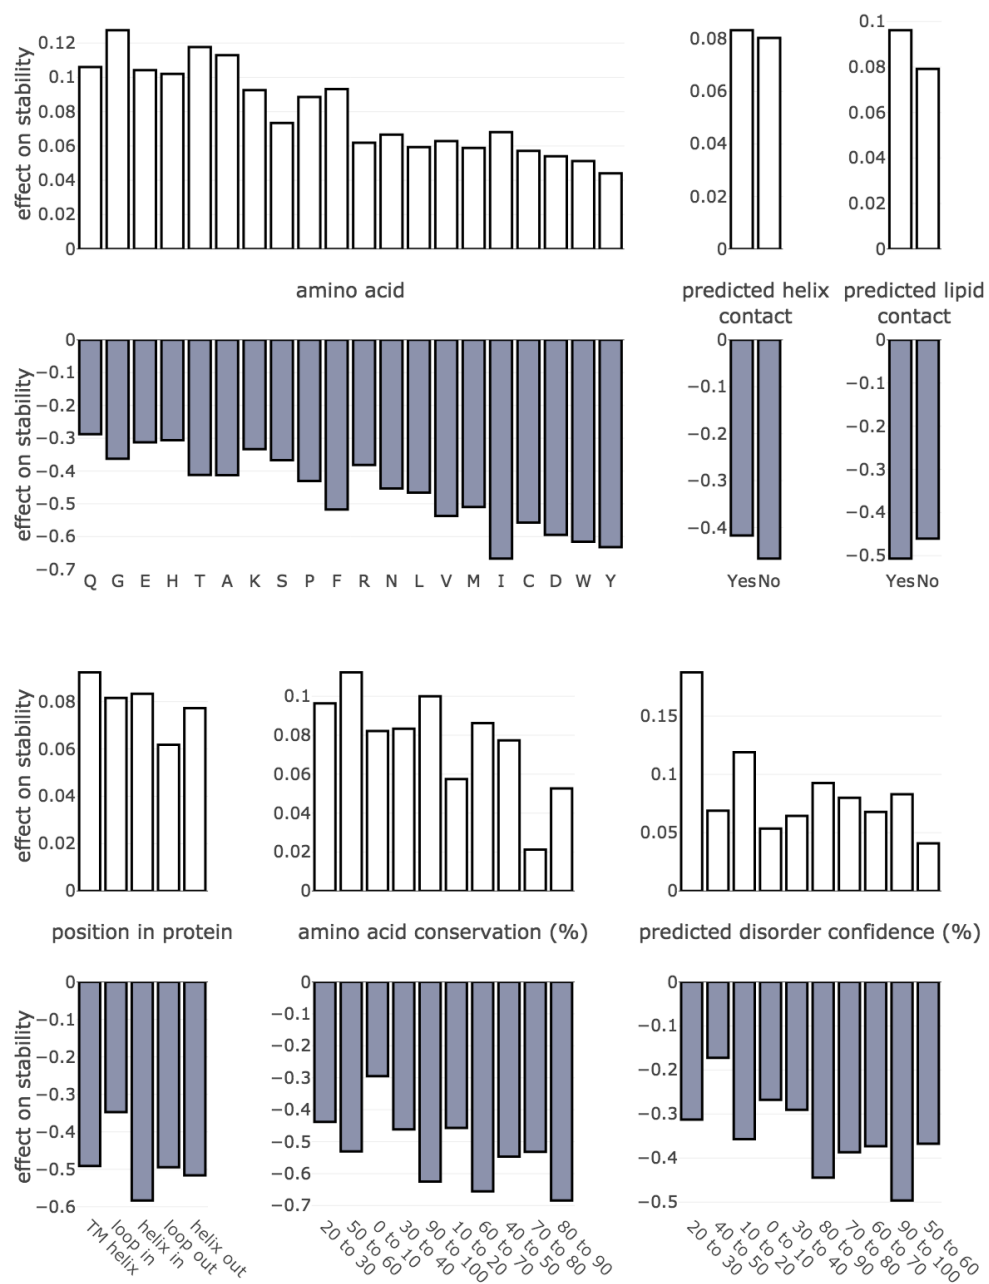

**Figure S1. Analysis of stabilising versus destabilising trends in GPCR datasets.** Analysis of stabilising versus destabilising trends in GPCR datasets when correlated with bioinformatic information. The frequency with which a factor was associated with stabilising or destabilising effects when changed to alanine (or leucine if natively an alanine) was calculated and normalised to the total number of observations of each factor. This provided a score for effect on stability for stabilisation (scale of 0 to 1) or destabilisation (scale of 1 to 0).

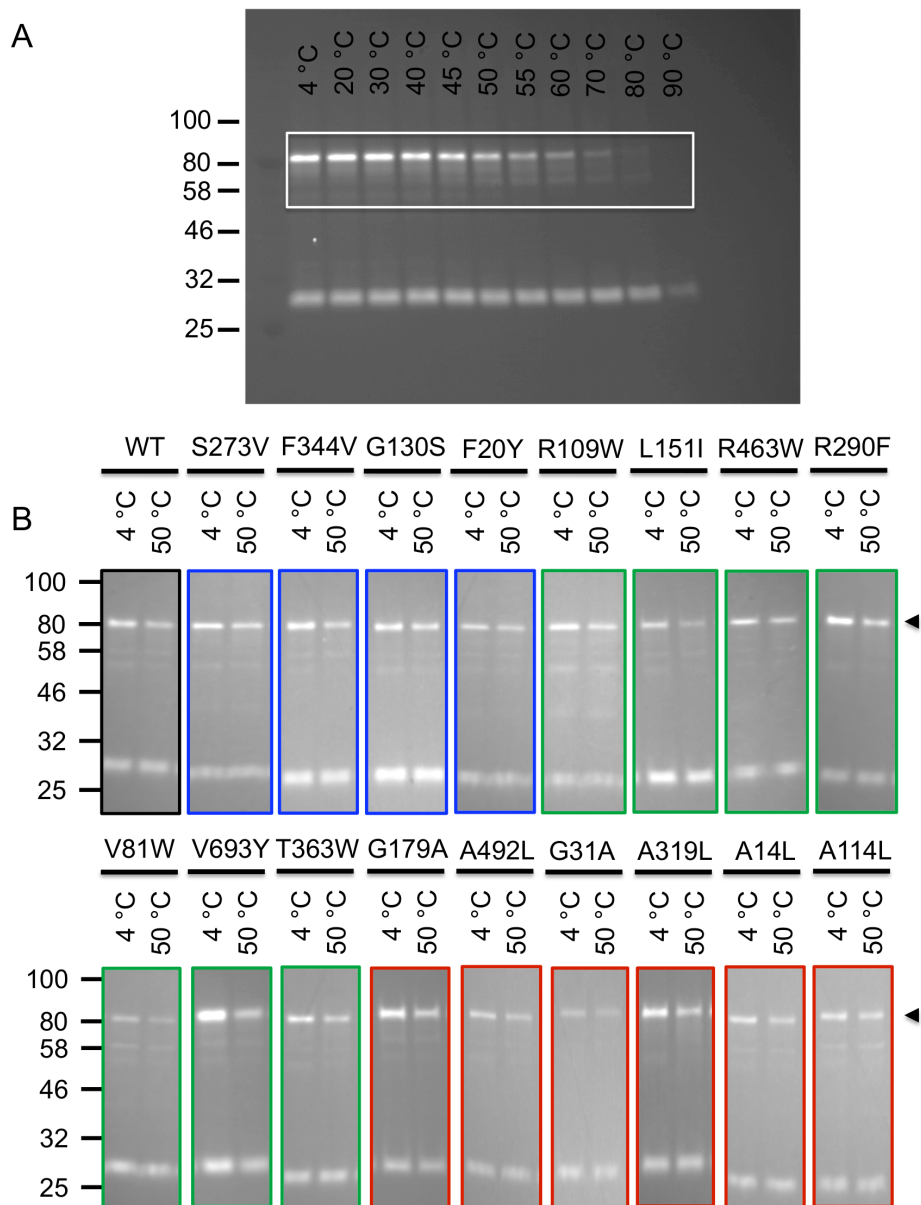

**Figure S2. In-gel GFP-fluorescence analysis of CIPPase stability.** A) Representative example of in-gel GFP-fluorescence from melting curve analysis of wild-type CIPPase. The white box denotes the cropped image used for the panel insert in Fig. 3D. B) Representative gels of single-temperature CIPPase stability assay. The band analysed is denoted by a black arrow. Outer edge colouring around each panel is according to the prediction module of IMPROvER from which the variant was selected (blue: *deep-sequence* based, green: *model-based*, red: *data-driven*).

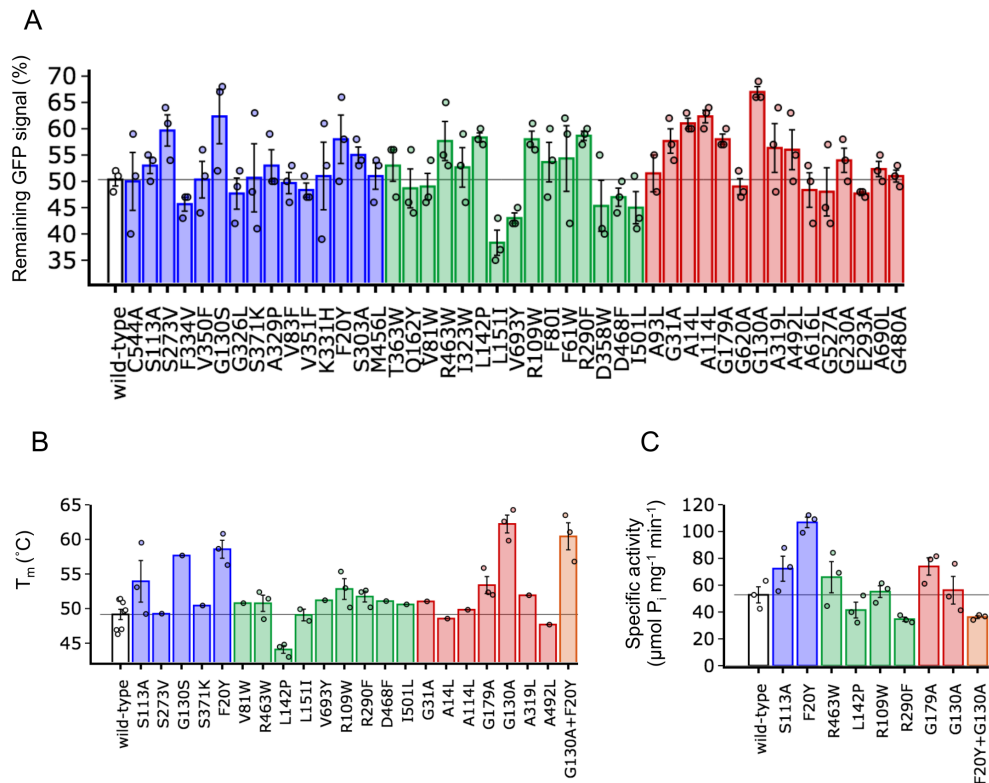

**Figure S3. Extended data for CIPPase variant stability and activity data.** A) Single-temperature stability assay results for CIPPase variants. Averages were derived from three biological repeats as indicated by open circles associated with each bar. B) Ten-temperature melting curve stability analysis results for select CIPPase variants. Values are derived from single experiments, or up to three repeats for variants (as indicated by open circles associated with each bar). Wild-type was tested eight times to provide a robust measurement for comparison. C) PP<sub>i</sub> hydrolysis activity assay results for top stabilising and one destabilising (L142P) CIPPase variant. Values derived from three technical repeats. Colouring in all panels is according to the prediction module of IMPROVER from which the variant was selected (blue: *deep-sequence* based, green: *model-based*, red: *data-driven*). Orange has been used for the double F20Y/G130A variant. Error bars in all panels representative of the SEM.

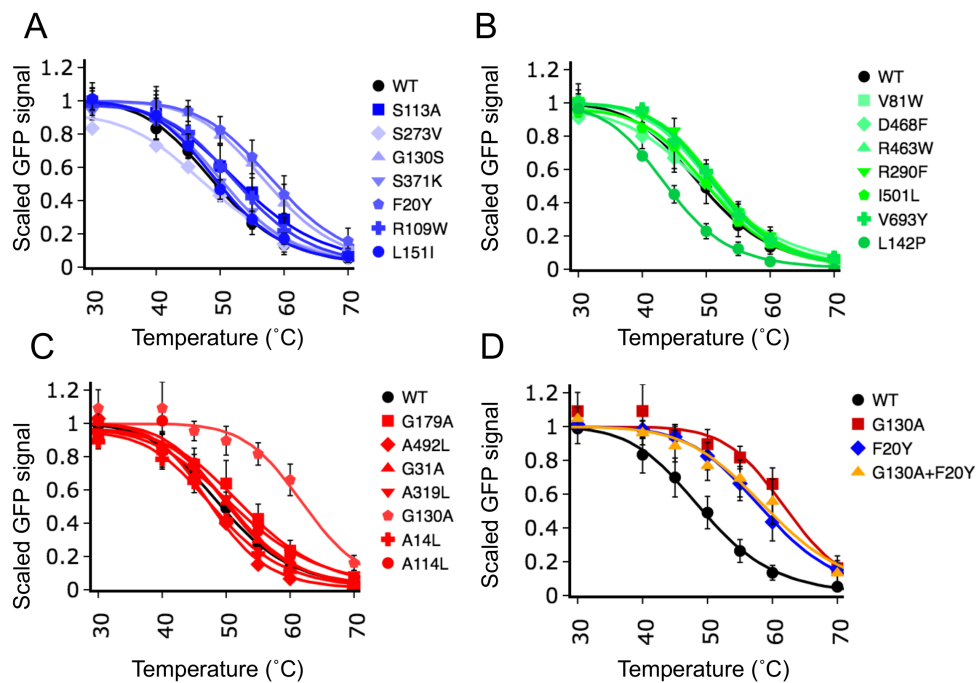

**Figure S4. Melting curves of CIPPase.** Protein that remained in solution after challenge in a ten-temperature melting curve was quantified using in-gel GFP fluorescence. Data for wild-type (black line) plotted with variants selected by the A) *deep-sequence* based (blue), B) *model-based* (green) or C) *data-driven* (red) modules of IMPROVER. D) The double variant of G130A+F20Y (orange) has been plotted relative to the single G130A (red) and F20Y (blue) variants as well as wild-type (black). Three repetitions were done for the six best variants identified after recording the first round of melting curves for the selected variants. Error bars are representative of the standard deviation where repetitions were carried out. Data were fitted using a four-parameter dose-response curve (variable slope) by non-linear least-squares.

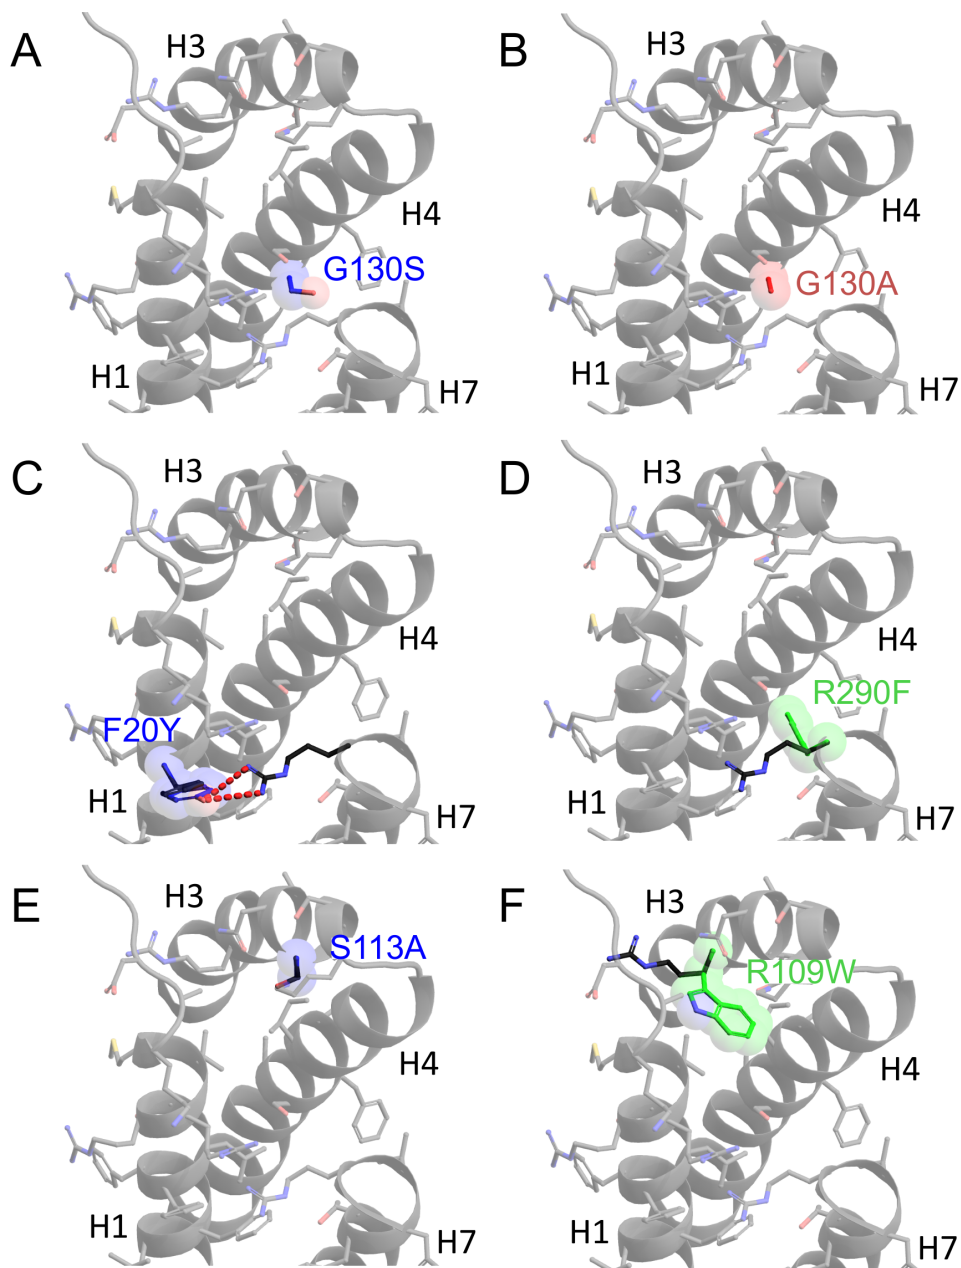

**Figure S5. Structural rationalisation of stabilising CIPPase variants.** A close-up view of helices (H) 1, 3, 4 and 7 in the best comparative homology model of CIPPase, representing a ‘hot-spot’ for stabilising mutations in CIPPase (all other helices removed for clarity). Six of the stabilising variants were located in this region: A) G130S, B) G130A, C) F20Y, D) R290F, E) S113A and F) R109W. Stabilising variants are shown in colour and space-filling spheres according to the prediction module of IMPROvER from which they were selected (blue: *deep-sequence* based, green: *model-based*, red: *data-driven*), with the native residue for the position or important interacting residues shown in black (all others shown in grey). Potential salt-bridge interactions are displayed as red dashed lines. Oxygen atoms are coloured red and nitrogen blue.

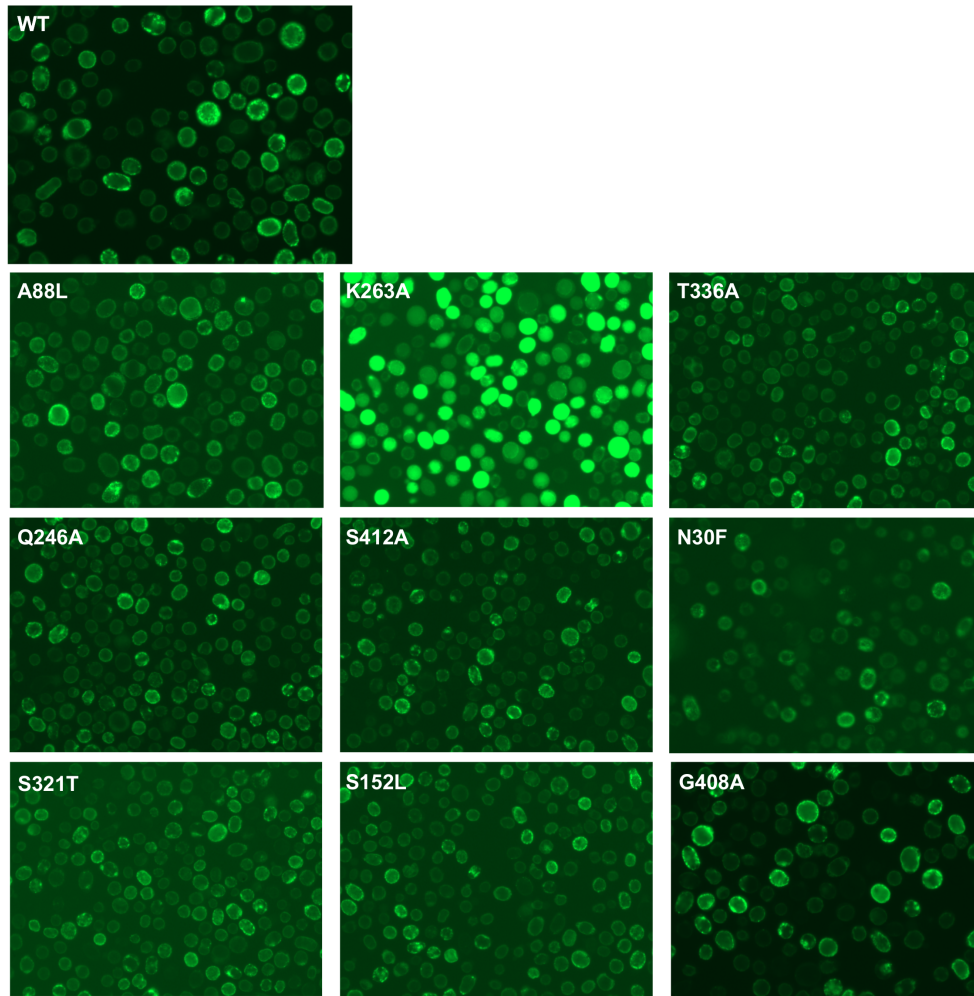

**Figure S6. In-cell GFP-fluorescence for hENT1 variants.** Representative example fluorescent confocal microscopy of GFP-signal from *Sf9* insect cells 3 days post baculovirus transfection. Examples of cells expressing wild-type hENT1 and the hENT1 variants A88L, K263A, T336A, Q246A, S412A, N30F, S321T, S152L and G408A. The GFP signal in K263A appears greater than in the other cells, which could be due to increased protein expression levels but more likely due to an automatically selected longer exposure by the instrument. Images acquired with an EVOS FL fluorescence confocal microscope. Images produced at 20x magnification for all except WT and G408A, which are at 40x magnification.

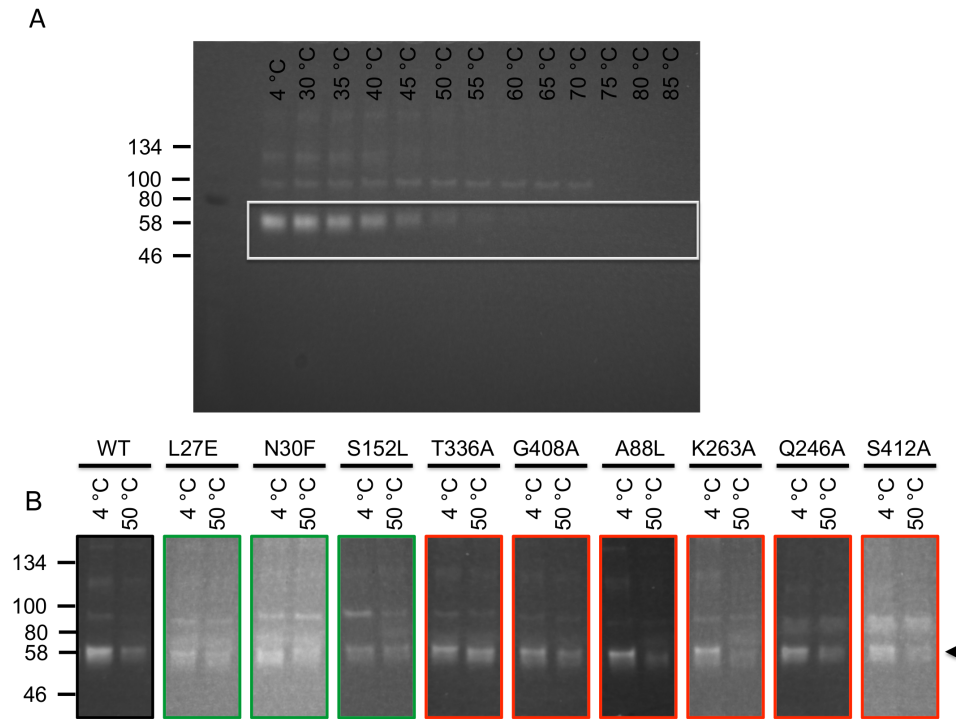

**Figure S7. In-gel GFP-fluorescence analysis of hENT1 stability.** A) Representative example of in-gel GFP-fluorescence from melting curve analysis of wild-type hENT1. The white box denotes the cropped image used for the panel insert in Fig. 4E. B) Representative gels of single-temperature hENT1 stability assay. The band analysed is denoted by a black arrow. Outer edge colouring around each panel is according to the prediction module of IMPROVER from which the variant was selected (blue: *deep-sequence* based, green: *model-based*, red: *data-driven*).



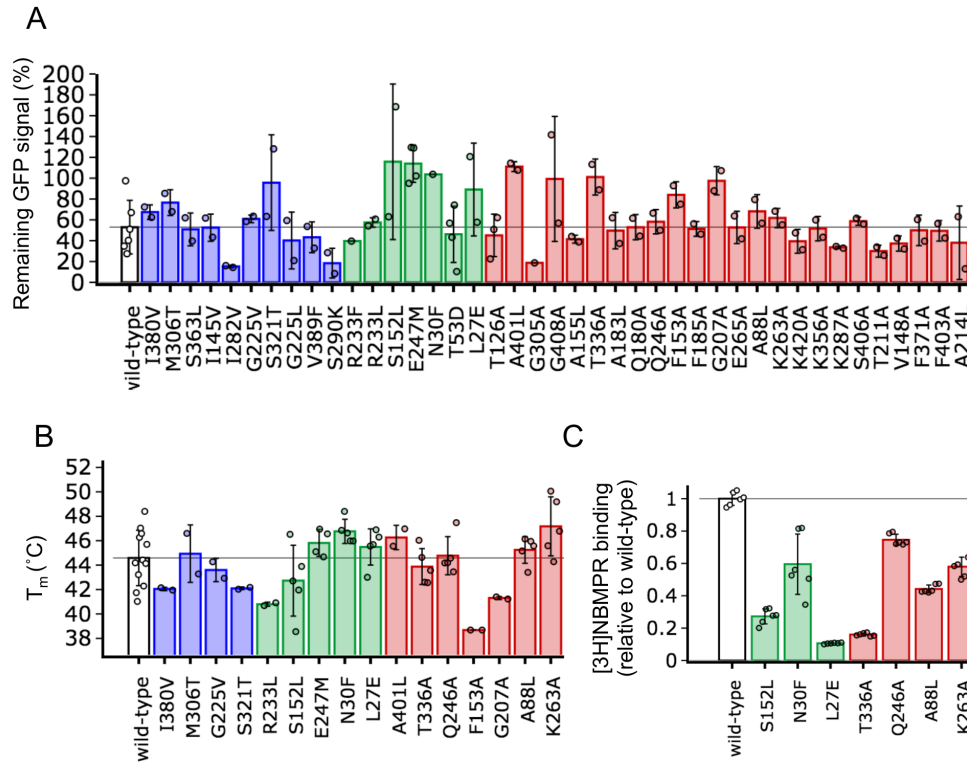

**Figure S8. Extended data for hENT1 variant stability and ligand binding analysis.** A) Single temperature stability assay results for hENT1 variants. Averages were derived from two or three biological repeats as indicated by open circles associated with each bar. B) Ten-temperature melting curve stability analysis results for selected hENT1 variants. Values are the average of five repeats for variants except for wild-type (as indicated by open circles associated with each bar). C) Binding of the radiolabelled hENT1 specific inhibitor NBMPR. Values are derived from the average of six readings from three biological repeats (two from each). Colouring in all panels is according to the prediction module of IMPROVER (blue: *deep-sequence* based, green: *model-based*, red: *data-driven*). Error bars in all panels representative of the SEM.

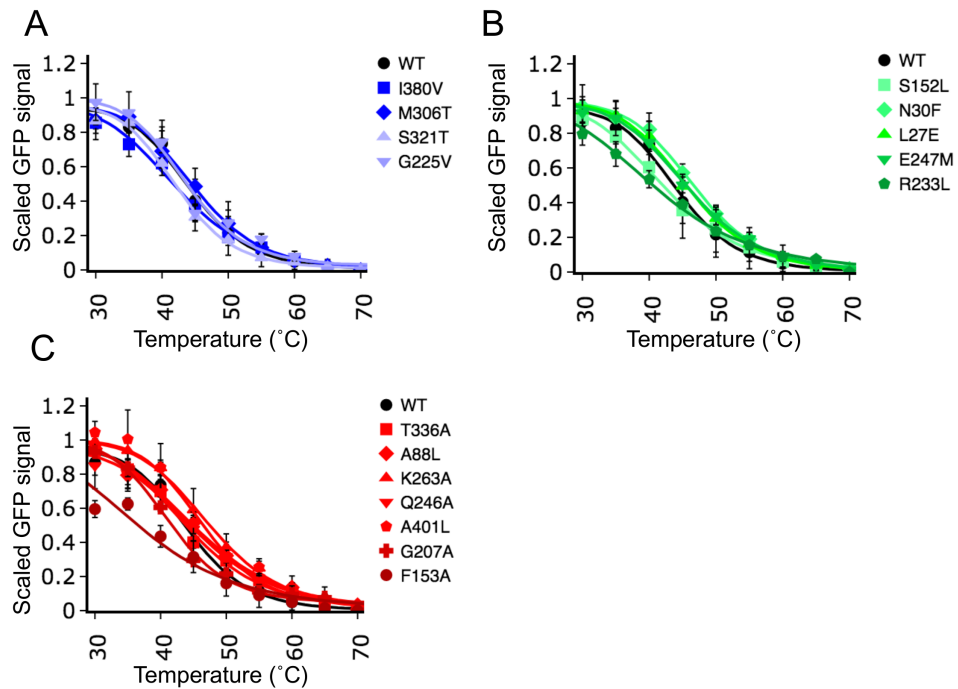

**Figure S9. Melting curves of hENT1.** Protein that remained in solution after challenge in a ten-temperature melting curve was quantified using in-gel GFP fluorescence. Data for wild-type (black line) plotted with variants selected by the A) *deep-sequence-based* (blue), B) *model-based* (green) or C) *data-driven* (red) modules of IMPROVER. Error bars are representative of the standard deviation from five repetitions. Data were fitted using a four-parameter dose-response curve (variable slope) by non-linear least-squares fitting.

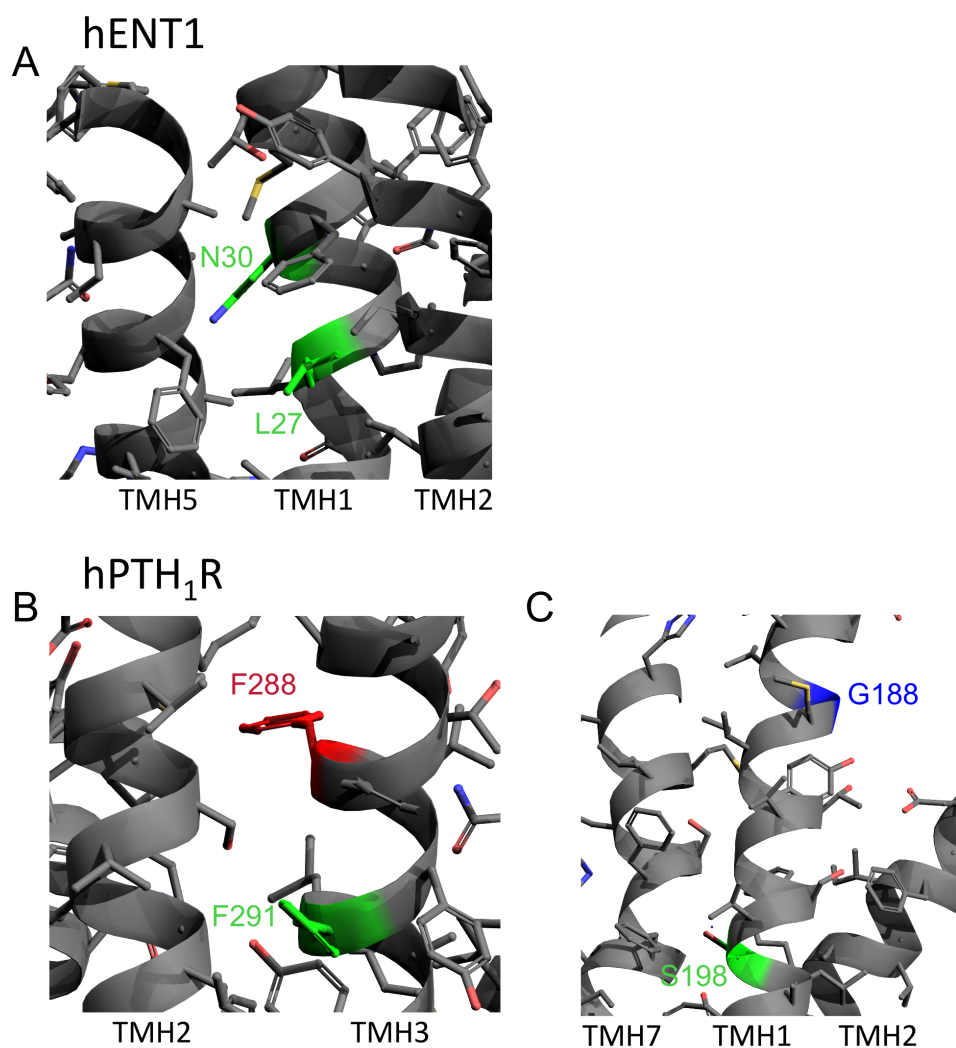

**Figure S10. Structural rationalisation of stabilising hENT1 and hPTH<sub>1</sub>R variants.** A) Close-up view of transmembrane helices (TMH) 1, 2 and 5 to highlight the positions of the stabilising variants L27E and N30F in hENT1. B) Close-up view of TMH2 and TMH3 to highlight the positions of the stabilising variants F288A and F291T in hPTH<sub>1</sub>R. C) Close-up view of TMH2 and TMH3 to highlight the positions of the stabilising variants F288A and F291T in hPTR<sub>1</sub>. Stabilising variants are shown in colour according to the prediction module of IMPROVER from which they were selected (green: *model-based*, red: *data-driven*), with all other residues shown in grey. Oxygen atoms are coloured red, nitrogen blue and sulphur yellow.

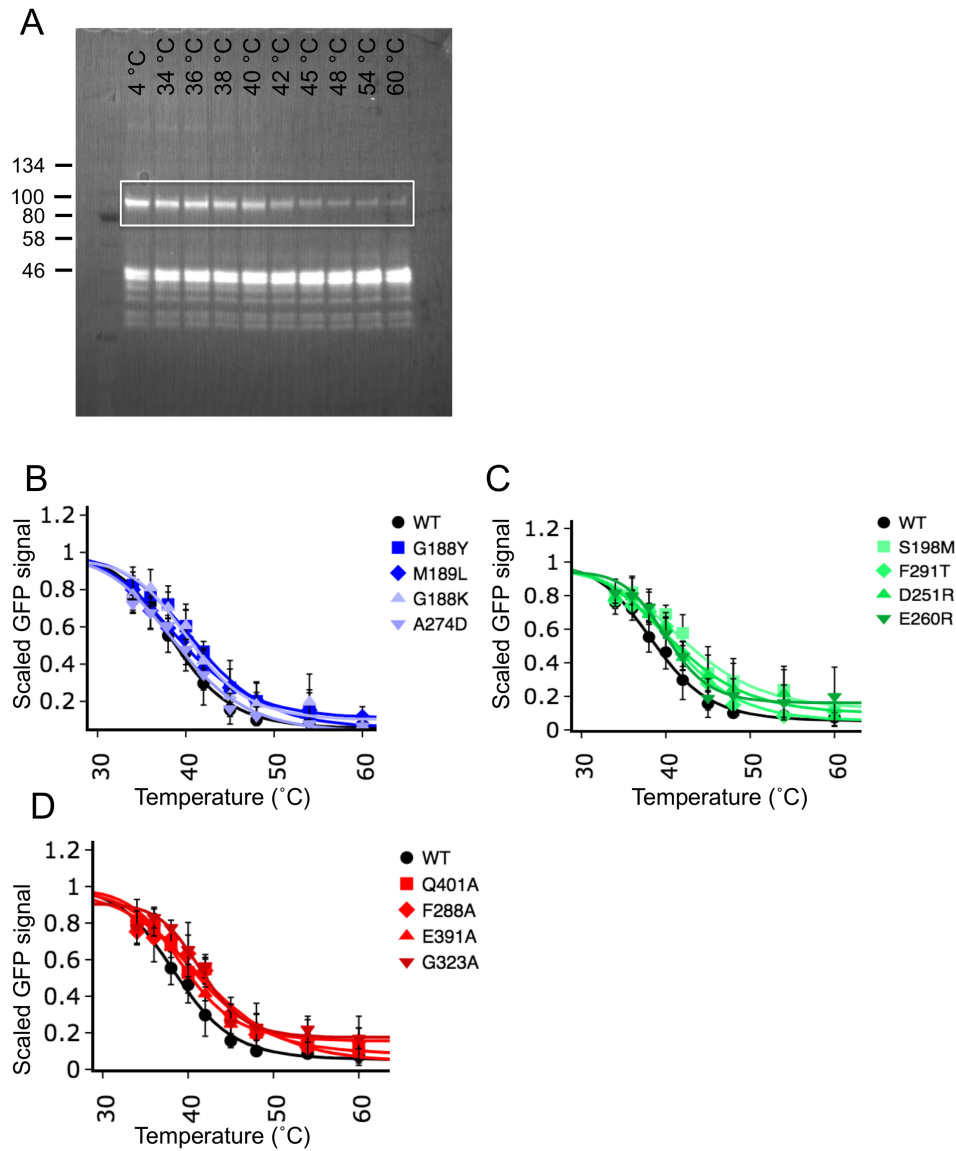

**Figure S11. In-gel GFP-fluorescence analysis and melting curves of hPTH<sub>1</sub>R.** A) Representative example of in-gel GFP-fluorescence from melting curve analysis of wild-type hPTH<sub>1</sub>R. The white box denotes the cropped image used for the panel insert in Fig. 5E. Protein that remained in solution after challenge in a ten-temperature melting curve was quantified using in-gel GFP fluorescence. Data for wild-type (black line) plotted with variants selected by the B) *deep-sequence*-based (blue), C) *model-based* (green) or D) *data-driven* (red) modules of IMPROVER. Error bars are representative of the standard deviation from three repetitions. Data were fitted using a four-parameter dose-response curve (variable slope) by non-linear least-squares fitting.

**Table S1.** Scoring matrix for data-driven approach of stabilising variant selection

| Amino acid | Score |
|------------|-------|
| Q          | 37    |
| G          | 36    |
| E          | 34    |
| H          | 34    |
| T          | 32    |
| A          | 30    |
| K          | 30    |
| S          | 26    |
| P          | 23    |
| F          | 21    |
| R          | 21    |
| N          | 19    |
| L          | 15    |
| V          | 14    |
| M          | 13    |
| I          | 11    |
| C          | 9     |
| D          | 7     |
| W          | 5     |
| Y          | 3     |

  

| Lipid contact prediction | Score |
|--------------------------|-------|
| Yes                      | 3     |
| No                       | 2     |

  

| Helix-helix contact prediction | Score |
|--------------------------------|-------|
| Yes                            | 3     |
| No                             | 2     |

  

| Topology            | Score |
|---------------------|-------|
| TM helix            | 9     |
| Cytosolic loop      | 8     |
| Cytosolic helix     | 5     |
| Extracellular loop  | 4     |
| Extracellular helix | 4     |

  

| AA conservation (%) | Score |
|---------------------|-------|
| 20 to 30            | 17    |
| 50 to 60            | 16    |
| 0 to 10             | 15    |
| 30 to 40            | 13    |
| 90 to 100           | 12    |
| 10 to 20            | 12    |
| 60 to 70            | 9     |
| 40 to 50            | 8     |
| 70 to 80            | 6     |
| 80 to 90            | 3     |

  

| Disorder confidence score (%) | Score |
|-------------------------------|-------|
| 20 to 30                      | 17    |
| 40 to 50                      | 15    |
| 10 to 20                      | 15    |
| 30 to 40                      | 11    |
| 0 to 10                       | 11    |
| 80 to 90                      | 10    |
| 70 to 80                      | 9     |
| 90 to 100                     | 8     |
| 60 to 70                      | 8     |
| 50 to 60                      | 6     |

**Table S2.** Table of residues selected by IMPROvER for CIPPase stabilisation

| Module        | IMPROvER Score | Variant   | Sequence conservation (%) | Remaining GFP-signal (%) <sup>a</sup> | Error (±%) <sup>b</sup> | repeats (n) | $T_m$ (°C) <sup>c</sup> | Error (±°C) <sup>b</sup> | repeats (n) | Comment                    |
|---------------|----------------|-----------|---------------------------|---------------------------------------|-------------------------|-------------|-------------------------|--------------------------|-------------|----------------------------|
| n/a           | n/a            | wild-type | n/a                       | 50.3                                  | 1.2                     | 3           | 49.3                    | 0.9                      | 8           | n/a                        |
| deep-sequence | 1.00           | C544A     | 0                         | 50.0                                  | 5.5                     | 3           | -                       | -                        | -           | neutral                    |
| deep-sequence | 1.00           | S113A     | 2                         | 53.0                                  | 1.5                     | 3           | 53.6                    | 2.8                      | 3           | stabilising                |
| deep-sequence | 1.00           | S273V     | 1                         | 59.7                                  | 3.0                     | 3           | 48.8                    | -                        | 1           | neutral                    |
| deep-sequence | 1.00           | F334V     | 5                         | 53.3                                  | 8.4                     | 3           | -                       | -                        | -           | neutral                    |
| deep-sequence | 0.99           | V350F     | 12                        | 50.3                                  | 3.5                     | 3           | -                       | -                        | -           | neutral                    |
| deep-sequence | 0.97           | G130S     | 15                        | 62.3                                  | 5.2                     | 3           | 57.4                    | -                        | 1           | stabilising                |
| deep-sequence | 0.97           | G326L     | 2                         | 47.7                                  | 3.0                     | 3           | -                       | -                        | -           | neutral                    |
| deep-sequence | 0.97           | S371K     | 9                         | 50.7                                  | 6.5                     | 3           | 50.6                    | -                        | 1           | neutral                    |
| deep-sequence | 0.97           | A329P     | 3                         | 53.0                                  | 3.0                     | 3           | -                       | -                        | -           | neutral                    |
| deep-sequence | 0.96           | V83F      | 25                        | 49.7                                  | 2.0                     | 3           | -                       | -                        | -           | neutral                    |
| deep-sequence | 0.96           | V351F     | 18                        | 48.3                                  | 1.3                     | 3           | -                       | -                        | -           | neutral                    |
| deep-sequence | 0.95           | K331H     | 4                         | 51.0                                  | 6.4                     | 3           | -                       | -                        | -           | neutral                    |
| deep-sequence | 0.95           | F20Y      | 11                        | 58.0                                  | 4.6                     | 3           | 58.4                    | 1.2                      | 3           | stabilising                |
| deep-sequence | 0.95           | S303A     | 8                         | 55.0                                  | 1.5                     | 3           | -                       | -                        | -           | neutral                    |
| deep-sequence | 0.94           | M456L     | 12                        | 51.0                                  | 2.5                     | 3           | -                       | -                        | -           | neutral                    |
| model-based   | 1.00           | T363W     | 12                        | 53.0                                  | 3.0                     | 3           | -                       | -                        | -           | neutral                    |
| model-based   | 0.99           | Q162Y     | 1                         | 48.7                                  | 3.7                     | 3           | -                       | -                        | -           | neutral                    |
| model-based   | 0.99           | V81W      | 16                        | 59.7                                  | 6.5                     | 3           | 50.5                    | -                        | 1           | stabilising                |
| model-based   | 0.99           | R463W     | 27                        | 57.7                                  | 6.0                     | 3           | 51.1                    | 1.3                      | 3           | neutral due to large error |
| model-based   | 0.99           | I323W     | 11                        | 52.7                                  | 3.8                     | 3           | -                       | -                        | -           | neutral                    |
| model-based   | 0.98           | L142P     | 75                        | 41.5                                  | 16.5                    | 2           | 44                      | 0.5                      | 3           | destabilising              |
| model-based   | 0.98           | L151I     | 38                        | 38.3                                  | 2.4                     | 3           | 49.7                    | 1.2                      | 2           | neutral                    |
| model-based   | 0.97           | V693Y     | 15                        | 43.0                                  | 1.0                     | 3           | 51.4                    | -                        | 1           | stabilising                |
| model-based   | 0.97           | R109W     | 96                        | 58.0                                  | 1.5                     | 3           | 52.7                    | 1.7                      | 3           | stabilising                |
| model-based   | 0.96           | F80I      | 11                        | 53.7                                  | 3.8                     | 3           | -                       | -                        | -           | neutral                    |
| model-based   | 0.95           | F61W      | 8                         | 54.3                                  | 6.2                     | 3           | -                       | -                        | -           | neutral                    |
| model-based   | 0.95           | R290F     | 34                        | 58.7                                  | 0.9                     | 3           | 52.0                    | 0.6                      | 3           | stabilising                |
| model-based   | 0.95           | D358W     | 6                         | 45.3                                  | 4.8                     | 3           | -                       | -                        | -           | neutral                    |
| model-based   | 0.94           | D468F     | 99                        | 47.0                                  | 1.7                     | 3           | -                       | -                        | -           | stabilising                |
| model-based   | 0.94           | I501L     | 18                        | 45.0                                  | 3.1                     | 3           | 50.6                    | -                        | 1           | neutral                    |
| data-driven   | 0.99           | A93L      | 35                        | 51.5                                  | 3.5                     | 2           | -                       | -                        | -           | neutral                    |
| data-driven   | 0.98           | G31A      | 82                        | 57.7                                  | 2.3                     | 3           | 51.0                    | -                        | 1           | stabilising                |
| data-driven   | 0.96           | A14L      | 54                        | 61.0                                  | 1.0                     | 3           | 48.4                    | -                        | 1           | neutral                    |
| data-driven   | 0.95           | A114L     | 88                        | 63.5                                  | 0.5                     | 2           | 50.2                    | -                        | 1           | neutral                    |
| data-driven   | 0.91           | G179A     | 60                        | 58.0                                  | 1.0                     | 3           | 52.9                    | 1.5                      | 3           | stabilising                |
| data-driven   | 0.90           | G620A     | 96                        | 49.0                                  | 1.5                     | 3           | -                       | -                        | -           | neutral                    |
| data-driven   | 0.88           | G130A     | 15                        | 67.0                                  | 1.0                     | 3           | 62.3                    | 1.1                      | 3           | stabilising                |
| data-driven   | 0.85           | A319L     | 8                         | 56.3                                  | 4.6                     | 3           | 51.5                    | -                        | 1           | stabilising                |
| data-driven   | 0.85           | A492L     | 52                        | 56.0                                  | 3.8                     | 3           | 47.7                    | -                        | 1           | destabilising              |
| data-driven   | 0.84           | A616L     | 33                        | 48.3                                  | 3.3                     | 3           | -                       | -                        | -           | neutral                    |
| data-driven   | 0.79           | G527A     | 51                        | 49.5                                  | 9.0                     | 3           | -                       | -                        | -           | neutral                    |
| data-driven   | 0.75           | G230A     | 99                        | 54.0                                  | 2.3                     | 3           | -                       | -                        | -           | neutral                    |
| data-driven   | 0.71           | E293A     | 25                        | 47.7                                  | 0.3                     | 3           | -                       | -                        | -           | neutral                    |
| data-driven   | 0.70           | A690L     | 54                        | 52.3                                  | 1.5                     | 3           | -                       | -                        | -           | neutral                    |
| data-driven   | 0.68           | G480A     | 94                        | 51.0                                  | 1.2                     | 3           | -                       | -                        | -           | neutral                    |

<sup>a</sup> Calculated based on remaining in-gel GFP-signal after single-point temperature challenge thermostability assay.

<sup>b</sup> For  $n > 1$ : standard error of the mean (SEM) shown.

<sup>c</sup> Average  $T_m$  was calculated from individual  $T_m$  estimated for each individual repeat by fitting with a four-parameter dose-response curve (variable slope) by non-linear least-squares fitting in the python package *scipy.stats*

**Table S3.** Table of residues excluded from selection in CIPPase stabilisation

| CIPPase Residue | PPase Study †                                                                                      | Mutation Studied                                                           | B-W ‡ | Location         | Role /Effect                       | Ref*                                |
|-----------------|----------------------------------------------------------------------------------------------------|----------------------------------------------------------------------------|-------|------------------|------------------------------------|-------------------------------------|
| S173            | TmPPase, AVP1, AVP1, ScPPase, VrPPase                                                              | M174, E229Q, E229D, K190R, E225                                            | 5.33  | exit channel     | facilitates ion release            | 1, 3, 3, 9, 13                      |
| L176            | TmPPase, mPPase, ScPPase, ScPPase, VrPPase                                                         | S177, E193A, E193D, T228                                                   | 5.36  | exit channel     | facilitates ion release            | 1, 7, 9, 9, 13                      |
| M180            | TmPPase                                                                                            | L181                                                                       | 5.4   | hydrophobic gate | prevent back-flow of ions?         | 1                                   |
| R190            | TmPPase, RbPPase, RbPPase, ScPPase, ScPPase, AVP1, AVP1, VrPPase, VrPPase                          | R191, R176A, R176K, R207A, R207K, R246A, R246K, R242, R242                 | 5.42  | coupling funnel  | coupling of pumping and hydrolysis | 1, 8, 8, 9, 9, 10, 10, 13, 13       |
| K198            | TmPPase, VrPPase, VrPPase                                                                          | K199, K250A, K250                                                          | 5.58  | coupling funnel  | coupling of pumping and hydrolysis | 1, 11, 13                           |
| D231            | TmPPase, VrPPase, VrPPase, RbPPase, RbPPase, ScPPase, VrPPase, RbPPase, RbPPase                    | D232, D283A, D283E, D217A, D217E, D248G, D283, D217A, D217H                | -     | -                | loose coupling                     | 1, 4, 4, 8, 8, 9, 13, 14, 14        |
| D235            | TmPPase, VrPPase, VrPPase, ScPPase, VrPPase                                                        | D236, D287A, D287E, D252G, D287                                            | 6.43  | active site      | coordination nucleophile           | 1, 4, 4, 9, 13                      |
| D242            | TmPPase, ScPPase, VrPPase, VrPPase, VrPPase, VrPPase, VrPPase, VrPPase                             | D243, D259G, D294A, D294N, D294E, D294T, D294A, D294                       | 6.5   | ion-gate         | ion-selectivity                    | 1, 9, 11, 13, 13, 13, 13, 13        |
| E245            | TmPPase, RbPPase, RbPPase, ScPPase, ScPPase, ScPPase, VrPPase, ChlPPase, BvPPase, BvPPase, BvPPase | E246, E231Q, E231D, E262A, E262D, E262Q, G297A, E242D, E246A, E246Q, E246D | -     | -                | enhanced activity                  | 1, 8, 8, 9, 9, 9, 10, 7, 16, 16, 16 |
| S253            | TmPPase, VrPPase, VrPPase, VrPPase                                                                 | S254, A305S, A305, A305                                                    | 6.61  | exit channel     | facilitates ion release            | 1, 10, 13, 13                       |
| A260            | TmPPase, VrPPase, VrPPase                                                                          | Y261, I312A, I312                                                          | 6.68  | exit channel     | facilitates ion release            | 1, 10, 13                           |
| D484            | TmPPase                                                                                            | D458                                                                       | -     | coupling funnel  | coupling of pumping and hydrolysis | 1                                   |
| D445            | TmPPase, VrPPase, VrPPase, VrPPase                                                                 | D465, D507A, D507                                                          | 11.57 | active site      | substrate/product binding          | 1, 11, 13                           |
| D472            | TmPPase, VrPPase, VrPPase                                                                          | N492, N534A, D534                                                          | 12.43 | active site      | substrate/product binding          | 1, 11, 13                           |
| K479            | TmPPase, RbPPase, RbPPase, RbPPase, RbPPase, BvPPase, BvPPase                                      | K499, K469A, K469D, K469R, K469R, K489R, K489A                             | -     | -                | loose coupling/ low affinity       | 1, 8, 8, 8, 14, 16, 16              |

*Continued on next page*

Table S3 – Continued from previous page

| CIPase Residue | PPase Study †                                                                                                                                                                                                                                                                                                       | Mutation Studied                                                                                                                                          | B-W ‡ | Location                           | Role /Effect                       | Ref*                                                                         |
|----------------|---------------------------------------------------------------------------------------------------------------------------------------------------------------------------------------------------------------------------------------------------------------------------------------------------------------------|-----------------------------------------------------------------------------------------------------------------------------------------------------------|-------|------------------------------------|------------------------------------|------------------------------------------------------------------------------|
| A482           | TmPPase,<br>ScPPase,<br>ScPPase,<br>ScPPase,<br>ScPPase,<br>ScPPase,<br>ScPPase,<br>ScPPase,<br>ScPPase,<br>ScPPase,<br>ScPPase,<br>ScPPase,<br>ScPPase,<br>ScPPase,<br>ScPPase,<br>ScPPase,<br>ScPPase,<br>ScPPase,<br>ScPPase,<br>ScPPase,<br>ScPPase,<br>ScPPase,<br>ScPPase,<br>VrPPase,<br>VrPPase,<br>VrPPase | A502,<br>A514S,<br>A514L,<br>A514I,<br>A514M,<br>A514P,<br>A514Y,<br>A514F,<br>A514W,<br>A514D,<br>A514E,<br>A514N,<br>A514H,<br>A514K,<br>A514R,<br>A544 | 12.53 | coupling funnel                    | coupling of pumping and hydrolysis | 1, 12, 12,<br>12, 12, 12,<br>12, 12, 12,<br>12, 12, 12,<br>12, 12, 12,<br>13 |
| I483           | TmPPase,<br>VrPPase,<br>VrPPase                                                                                                                                                                                                                                                                                     | I503,<br>I545A, I545                                                                                                                                      | 12.54 | coupling funnel                    | coupling of pumping and hydrolysis | 1, 11, 13                                                                    |
| A486           | TmPPase,<br>VrPPase                                                                                                                                                                                                                                                                                                 | A506,<br>A548                                                                                                                                             | 12.57 | coupling funnel                    | coupling of pumping and hydrolysis | 1, 13                                                                        |
| A487           | TmPPase,<br>VrPPase                                                                                                                                                                                                                                                                                                 | I507, A549                                                                                                                                                | 12.58 | coupling funnel                    | coupling of pumping and hydrolysis | 1, 13                                                                        |
| L493           | TmPPase,<br>VrPPase,<br>VrPPase,<br>VrPPase                                                                                                                                                                                                                                                                         | L513,<br>L555A,<br>L555D,<br>L555                                                                                                                         | 12.64 | hydrophobic gate                   | prevent back-flow of ions?         | 1, 11, 11,<br>13                                                             |
| S496           | TmPPase                                                                                                                                                                                                                                                                                                             | S516                                                                                                                                                      | 12.67 | exit channel                       | facilitates ion release            | 1                                                                            |
| S246           | TmPPase,<br>ScPPase,<br>ScPPase,<br>ScPPase,<br>VrPPase,<br>VrPPase,<br>ChlPPase                                                                                                                                                                                                                                    | S247,<br>S263C,<br>S263A,<br>S263E,<br>S298A,<br>S298,<br>S243A                                                                                           | 6.54  | nearby ion-gate                    | sodium binding impaired            | 1, 6, 9, 9,<br>10, 13, 7                                                     |
| K638           | TmPPase,<br>VrPPase                                                                                                                                                                                                                                                                                                 | K663,<br>K694                                                                                                                                             | 15.64 | active site                        | substrate/product binding          | 1, 13                                                                        |
| K639           | TmPPase,<br>VrPPase,<br>VrPPase                                                                                                                                                                                                                                                                                     | K664,<br>K695A,<br>K695                                                                                                                                   | 15.65 | active site                        | substrate/product binding          | 1, 11, 13                                                                    |
| D661           | TmPPase,<br>VrPPase,<br>VrPPase,<br>VrPPase                                                                                                                                                                                                                                                                         | D688,<br>D723A,<br>D723E,<br>D723                                                                                                                         | 16.31 | active site                        | substrate/product binding          | 1, 4, 4, 13                                                                  |
| D665           | TmPPase,<br>VrPPase,<br>VrPPase,<br>VrPPase                                                                                                                                                                                                                                                                         | D692,<br>D727A,<br>D727E,<br>D727                                                                                                                         | 16.35 | active site                        | substrate/product binding          | 1, 4, 4, 13                                                                  |
| K668           | TmPPase,<br>VrPPase                                                                                                                                                                                                                                                                                                 | K695,<br>K730                                                                                                                                             | 16.38 | active site                        | substrate/product binding          | 1, 13                                                                        |
| D669           | TmPPase,<br>VrPPase,<br>VrPPase,<br>VrPPase,<br>BvPPase,<br>BvPPase                                                                                                                                                                                                                                                 | D696,<br>D731A,<br>D731E,<br>D731,<br>D704E,<br>D704A                                                                                                     | -     | -                                  | no activity                        | 1, 4, 4, 13,<br>16, 16                                                       |
| N676           | TmPPase,<br>VrPPase,<br>VrPPase,<br>ChlPPase                                                                                                                                                                                                                                                                        | D703,<br>N738A,<br>N738,<br>N677D                                                                                                                         | 16.46 | nearby ion-gate                    | sodium binding impaired            | 1, 11, 13,<br>7                                                              |
| K680           | TmPPase,<br>VrPPase,<br>VrPPase,<br>VrPPase,<br>VrPPase,<br>ChlPPase                                                                                                                                                                                                                                                | K707,<br>K742A,<br>K742R,<br>K742M,<br>K742,<br>K681N                                                                                                     | -     | ion-gate                           | no activity                        | 1, 13, 13,<br>13, 13, 7                                                      |
| M684           | TmPPase,<br>VrPPase,<br>VrPPase,<br>VrPPase                                                                                                                                                                                                                                                                         | V711,<br>V746A,<br>V746D,<br>V746                                                                                                                         | 16.54 | hydrophobic gate                   | prevent back-flow of ions?         | 1, 11, 11,<br>13                                                             |
| S691           | TmPPase,<br>VrPPase                                                                                                                                                                                                                                                                                                 | S718, P753                                                                                                                                                | 16.61 | exit channel                       | facilitates ion release            | 1, 13                                                                        |
| F76            | AVP1                                                                                                                                                                                                                                                                                                                | E119Q                                                                                                                                                     | -     | membrane cytosol interface<br>TMH2 | loose coupling                     | 3                                                                            |
| G249           | AVP1,<br>AVP1,<br>VrPPase,<br>VrPPase,<br>VrPPase                                                                                                                                                                                                                                                                   | E305Q,<br>E305D,<br>E301A,<br>E301, E301                                                                                                                  | 6.57  | coupling funnel                    | coupling of pumping and hydrolysis | 3, 3, 10,<br>13, 13                                                          |

Continued on next page



Table S3 – Continued from previous page

| CIPase Residue | PPase Study †                               | Mutation Studied                  | B-W ‡ | Location                            | Role /Effect                 | Ref*            |
|----------------|---------------------------------------------|-----------------------------------|-------|-------------------------------------|------------------------------|-----------------|
| E353           | AVP1, AVP1, RbPPase, RbPPase, RbPPase       | E427Q, E427D, E351D, E351A, E351Q | -     | membrane cytosol interface<br>TMH9  | loose coupling/ low affinity | 3, 3, 8, 8,     |
| D438           | AVP1, AVP1, RbPPase                         | D504N, D504E, D428N               | -     | membrane cytosol interface<br>TMH11 | no activity                  | 8<br>3, 3,      |
| T513           | AVP1                                        | D573N                             | -     | loop 13-14                          | enhanced activity            | 8<br>3          |
| N607           | AVP1, VrP-Pase                              | E667Q, E663A                      | -     | Transmembrane domain M15            | loose coupling               | 3, 11           |
| F685           | AVP1                                        | E751Q                             | -     | C-terminal end                      | loose coupling               | 3               |
| D201           | VrPPase, VrPPase, ScPPase, VrPPase          | D253A, D253E, D218G, D253         | -     | active site                         | substrate/product binding    | 4, 4, 9, 13     |
| V207           | VrPPase                                     | V259A                             | -     | -                                   | loose coupling/ low affinity | 4               |
| K209           | VrPPase, VrPPase, VrPPase                   | K261A, K261R, K261                | -     | active site                         | stabilising salt bridges?    | 4, 4, 13        |
| E211           | VrPPase, VrPPase, VrPPase, VrPPase, VrPPase | E263G, E263A, E263D, E268, E263   | -     | active site                         | stabilising salt bridges?    | 4, 4, 4, 13, 13 |
| D227           | VrPPase, VrPPase, ScPPase, VrPPase          | D279A, D279E, D244G, D279         | -     | active site                         | substrate/product binding    | 4, 4, 9, 13     |
| I252           | VrPPase                                     | C304R                             | -     | -                                   | loose coupling/ low affinity | 4               |
| A475           | mPPase                                      |                                   | 12.46 | active site                         | involved in K+ dependency    | 5               |
| G478           | mPPase                                      |                                   | 12.49 | active site                         | involved in K+ dependency    | 5               |
| V236           | ScPPase                                     | C253A                             | -     | -                                   | no activity                  | 6               |
| T369           | ScPPase                                     | S402C                             | -     | -                                   | no activity                  | 6               |
| E566           | ScPPase                                     | S609C                             | -     | -                                   | no activity                  | 6               |
| C578           | ScPPase                                     | C621A                             | -     | -                                   | no activity                  | 6               |
| S651           | ScPPase                                     | S694C                             | -     | -                                   | no activity                  | 6               |
| T87            | mPPase                                      |                                   | 3.45  | TMH3                                | dual pumping signature       | 7               |
| F91            | mPPase                                      |                                   | 3.49  | TMH3                                | dual pumping signature       | 7               |
| D143           | mPPase                                      |                                   | 4.6   | TMH4                                | dual pumping signature       | 7               |
| R105           | RbPPase                                     | R101K                             | -     | TMH3                                | enhanced activity            | 8               |
| G192           | RbPPase                                     | G178A                             | -     | TMH5                                | loose coupling/ low affinity | 8               |
| L387           | RbPPase, AVP1, AVP1                         | E385Q, K461R, K461A               | -     | loop 9-10                           | pump-less                    | 8, 10, 10       |
| E585           | RbPPase, RbPPase                            | E584A, E584D                      | -     | TMH14                               | loose coupling/ low affinity | 8,              |
| S630           | RbPPase                                     | G637A                             | -     | TMH15                               | loose coupling/ low affinity | 8               |
| T172           | ScPPase                                     | P189L                             | -     | TMH5                                | pump-less                    | 9               |
| A174           | ScPPase                                     | V191A                             | -     | -                                   | loose coupling               | 9               |
| T177           | ScPPase                                     | G194Q                             | -     | -                                   | loose coupling               | 9               |
| F178           | ScPPase                                     | F195L                             | -     | -                                   | pump-less                    | 9               |
| G181           | ScPPase                                     | G198A                             | -     | -                                   | no activity                  | 9               |
| S183           | ScPPase                                     | A200T                             | -     | -                                   | loose coupling               | 9               |
| M185           | ScPPase                                     | I202T                             | -     | -                                   | loose coupling               | 9               |
| F188           | ScPPase                                     | F205S                             | -     | -                                   | loose coupling               | 9               |
| G193           | ScPPase                                     | G210A                             | -     | -                                   | pump-less                    | 9               |
| G194           | ScPPase                                     | G211A                             | -     | -                                   | pump-less                    | 9               |
| D205           | ScPPase, VrPPase                            | D222G, D257                       | -     | active site                         | substrate/product binding    | 9, 13           |
| L206           | ScPPase                                     | L223P                             | -     | -                                   | no activity                  | 9               |
| A212           | ScPPase                                     | Q229R                             | -     | -                                   | loose coupling               | 9               |
| E216           | ScPPase                                     | E233G                             | -     | -                                   | loose coupling               | 9               |
| I225           | ScPPase                                     | I242T                             | -     | -                                   | loose coupling               | 9               |
| V229           | ScPPase, ScPPase                            | V246I, V246A                      | -     | -                                   | loose coupling               | 9,              |
| M239           | ScPPase                                     | M256T                             | -     | -                                   | loose coupling               | 9               |
| Y244           | ScPPase, VrPPase                            | F261L, F296A                      | -     | TMH6                                | loose coupling               | 9, 10           |
| G262           | ScPPase, VrPPase                            | A278V, S314A                      | -     | TMH6                                | low activity                 | 9, 10           |
| F265           | ScPPase, VrPPase, VrPPase                   | D281G, L317A, L317A               | -     | Vacuolar lumen loop                 | low activity                 | 9, 10, 11       |
| P271           | ScPPase                                     | P287A                             | -     | -                                   | loose coupling               | 9               |

Continued on next page

Table S3 – Continued from previous page

| CIPase Residue | PPase Study †                                                                   | Mutation Studied                                                  | B-W ‡ | Location                 | Role /Effect                        | Ref*                             |
|----------------|---------------------------------------------------------------------------------|-------------------------------------------------------------------|-------|--------------------------|-------------------------------------|----------------------------------|
| I277           | ScPPase                                                                         | I293V                                                             | -     | -                        | loose coupling                      | 9                                |
| G278           | ScPPase                                                                         | G294R                                                             | -     | -                        | no activity                         | 9                                |
| T291           | ScPPase                                                                         | P307A                                                             | -     | -                        | loose coupling                      | 9                                |
| N299           | ScPPase                                                                         | S313E                                                             | -     | -                        | loose coupling                      | 9                                |
| L306           | ScPPase                                                                         | R320C                                                             | -     | -                        | loose coupling                      | 9                                |
| S311           | ScPPase                                                                         | S325R                                                             | -     | -                        | no activity                         | 9                                |
| L314           | ScPPase                                                                         | I328T                                                             | -     | -                        | loose coupling                      | 9                                |
| T308           | ScPPase                                                                         | F322L                                                             | -     | -                        | loose coupling                      | 9                                |
| A318           | ScPPase                                                                         | L332P                                                             | -     | -                        | pump-less                           | 9                                |
| L327           | ScPPase                                                                         | V351A                                                             | -     | -                        | pump-less                           | 9                                |
| G328           | ScPPase                                                                         | A357G                                                             | -     | -                        | loose coupling                      | 9                                |
| Y335           | ScPPase,<br>ScPPase                                                             | L368P,<br>L368A                                                   | -     | -                        | no activity                         | 9,<br>9                          |
| G341           | ScPPase                                                                         | G374A                                                             | -     | -                        | no activity                         | 9                                |
| A344           | ScPPase                                                                         | L377P                                                             | -     | -                        | pump-less                           | 9                                |
| I348           | ScPPase,<br>ScPPase                                                             | I381P,<br>I381A                                                   | -     | -                        | loose coupling                      | 9,<br>9                          |
| G349           | ScPPase                                                                         | Q382R                                                             | -     | -                        | loose coupling                      | 9                                |
| L243           | VrPPase                                                                         | L295A                                                             | -     | TMH6                     | loose coupling                      | 10                               |
| Y247           | VrPPase                                                                         | Y299A                                                             | -     | TMH6                     | no expression                       | 10                               |
| V248           | VrPPase,<br>BvPPase                                                             | A300S,<br>C249S                                                   | -     | TMH6                     | enhanced activity                   | 10, 15                           |
| S250           | VrPPase                                                                         | S302A                                                             | -     | TMH6                     | enhanced activity                   | 10                               |
| I251           | VrPPase                                                                         | S303A                                                             | -     | TMH6                     | low activity                        | 10                               |
| T254           | VrPPase                                                                         | A306S                                                             | -     | TMH6                     | no expression                       | 10                               |
| A255           | VrPPase                                                                         | L307A                                                             | -     | TMH6                     | no expression                       | 10                               |
| A256           | VrPPase                                                                         | V308A                                                             | -     | TMH6                     | loose coupling                      | 10                               |
| L257           | VrPPase                                                                         | V309A                                                             | -     | TMH6                     | low activity                        | 10                               |
| A258           | VrPPase                                                                         | A310S                                                             | -     | TMH6                     | loose coupling                      | 10                               |
| A261           | VrPPase                                                                         | S313A                                                             | -     | TMH6                     | low activity                        | 10                               |
| L263           | VrPPase                                                                         | F315A                                                             | -     | TMH6                     | low activity                        | 10                               |
| G264           | VrPPase,<br>VrPPase                                                             | G316A,<br>G316A                                                   | -     | Vacuolar lumen loop      | loose coupling                      | 10, 11                           |
| K266           | VrPPase                                                                         | N318A                                                             | -     | TMH6                     | no expression                       | 10                               |
| T157           | VrPPase                                                                         | D218A                                                             | -     | Vacuolar lumen loop      | loose coupling                      | 11                               |
| T197           | VrPPase                                                                         | T249A                                                             | -     | Substrate binding site   | no activity                         | 11                               |
| D217           | VrPPase,<br>VrPPase                                                             | D269A,<br>D269                                                    | -     | active site              | substrate/product binding           | 11, 13                           |
| N228           | VrPPase                                                                         | N280A                                                             | -     | Substrate binding site   | low activity                        | 11                               |
| E698           | VrPPase                                                                         | E698A                                                             | -     | Transmembrane domain M15 | loose coupling                      | 11                               |
| I687           | VrPPase,<br>VrPPase                                                             | L749A,<br>L749D                                                   | -     | Coupling funnel          | no activity                         | 11, 11                           |
| Y355           | ScPPase,<br>ScPPase,<br>ScPPase,<br>ScPPase,<br>ScPPase,<br>ScPPase,<br>ScPPase | F388Y,<br>F388G,<br>F388P,<br>F388D,<br>F388E,<br>F388K,<br>F388R | -     | -                        | no expression                       | 12, 12, 12,<br>12, 12, 12,<br>12 |
| D635           | VrPPase                                                                         | D691                                                              | -     | active site              | substrate/product binding           | 13                               |
| R553           | VrPPase,<br>TmPPase                                                             | R609, R578                                                        | 13.62 | TMH13                    | links motion of inner to outer ring | 13, 13                           |
| S485           | VrPPase                                                                         | S547                                                              | -     | coupling funnel          | coordination of water               | 13                               |
| M189           | VrPPase                                                                         | L232                                                              | 5.4   | hydrophobic gate         | prevent back-flow of ions?          | 13                               |
| E500           | VrPPase                                                                         | R562                                                              | 12.71 | exit channel             | facilitates ion release             | 13                               |
| P374           | RbPPase                                                                         | H372A                                                             | -     | TMH10                    | loose coupling/ low affinity        | 14                               |
| E645           | RbPPase                                                                         | H652A                                                             | -     | -                        | loose coupling                      | 14                               |
| H654           | RbPPase                                                                         | H661A                                                             | -     | -                        | loose coupling/ low affinity        | 14                               |
| S695           | RbPPase                                                                         | H702V                                                             | -     | -                        | loose coupling/ low affinity        | 14                               |

† PPase abbreviations: AVP1; *Arabidopsis thaliana* (isoform 1), BvPPase; *Bacteroides vulgatus*, ChlPPase; *Chlorobium limicola*, PaPPase; *Pyrobaculum aerophilum*, RbPPase; *Rhodospirillum rubrum*, ScPPase; *Streptomyces coelicolor*, TmPPase; *Thermotoga maritima*, VrPPase; *Vigna radiata*

‡ B-W; Ballesteros–Weinstein numbering scheme

\* References: 1; Kellosoalo et al. 2012, 2; Harborne et al. 2018, 3; Zhen et al. 1997, 4; Nakanishi et al. 2001, 5; Belogurov Lahti 2002, 6; Mimura et al. 2004, 7; Luoto et al. 2013, 8; Schultz Baltscheffsky 2003, 9; Hirono, Nakanishi Maeshima 2007, 10; Pan et al. 2011, 11; Asaoka, Segami Maeshima 2014, 12; Hirono Maeshima 2009, 13; Lin et al. 2012, 14; Schultz Baltscheffsky 2004, 15; undergrad thesis Dovile Dormantaite 2016, 16; undergrad thesis Hannah Shephard 2016

**Table S4.** Table of residues selected by IMPROvER for hENT1 stabilisation

| Module        | IMPROvER Score | Variant   | Sequence conservation (%) | Remaining GFP-signal (%) <sup>a</sup> | Error (±%) <sup>b</sup> | repeats (n) | $T_m$ (°C) <sup>c</sup> | Error (±°C) <sup>b</sup> | repeats (n) | Comment       |
|---------------|----------------|-----------|---------------------------|---------------------------------------|-------------------------|-------------|-------------------------|--------------------------|-------------|---------------|
| n/a           | n/a            | wild-type | n/a                       | 53.0                                  | 10.5                    | 6           | 44.6                    | 0.6                      | 12          | n/a           |
| deep-sequence | 1.00           | I380V     | 16                        | 67.4                                  | 5.0                     | 2           | 42.0                    | 0.1                      | 2           | destabilisng  |
| deep-sequence | 0.96           | M306T     | 2                         | 76.6                                  | 8.8                     | 2           | 44.9                    | 0.1                      | 2           | neutral       |
| deep-sequence | 0.95           | S363L     | 4                         | 50.8                                  | 11.2                    | 2           | -                       | -                        | -           | neutral       |
| deep-sequence | 0.92           | I145V     | 18                        | 52.5                                  | 9.2                     | 2           | -                       | -                        | -           | neutral       |
| deep-sequence | 0.91           | I282V     | 11                        | 15.2                                  | 0.8                     | 2           | -                       | -                        | -           | destabilisng  |
| deep-sequence | 0.91           | G225V     | 2                         | 60.9                                  | 2.5                     | 2           | 43.6                    | 0.7                      | 2           | neutral       |
| deep-sequence | 0.87           | S321T     | 14                        | 95.7                                  | 32.4                    | 2           | 42.1                    | 0.1                      | 2           | destabilisng  |
| deep-sequence | 0.87           | G225L     | 2                         | 40.1                                  | 19.2                    | 2           | -                       | -                        | -           | neutral       |
| deep-sequence | 0.86           | V389F     | 20                        | 43.2                                  | 10.4                    | 2           | -                       | -                        | -           | neutral       |
| deep-sequence | 0.86           | S290K     | 5                         | 18.4                                  | 14.2                    | 2           | -                       | -                        | -           | destabilisng  |
| model-based   | 0.99           | R233F     | 38                        | 39.6                                  | -                       | 1           | -                       | -                        | -           | destabilisng  |
| model-based   | 0.99           | R233L     | 38                        | 57.4                                  | 3.2                     | 2           | 40.8                    | 0.1                      | 2           | destabilisng  |
| model-based   | 0.99           | S152L     | 20                        | 115.7                                 | 52.8                    | 2           | 42.7                    | 1.3                      | 5           | neutral       |
| model-based   | 0.98           | E247M     | 19                        | 113.9                                 | 9.0                     | 2           | 45.8                    | 0.6                      | 2           | stabilising   |
| model-based   | 0.98           | N30F      | 83                        | 103.7                                 | -                       | 1           | 46.8                    | 0.4                      | 5           | stabilising   |
| model-based   | 0.97           | T53D      | 2                         | 50.0                                  | 6.8                     | 2           | -                       | -                        | -           | neutral       |
| model-based   | 0.96           | L27E      | 56                        | 89.2                                  | 31.5                    | 2           | 45.5                    | 0.7                      | 5           | stabilising   |
| data-driven   | 1.00           | T126A     | 43                        | 45.1                                  | 20.4                    | 2           | -                       | -                        | -           | neutral       |
| data-driven   | 0.99           | A401L     | 12                        | 111.0                                 | 3.4                     | 2           | 46.3                    | 0.7                      | 2           | stabilising   |
| data-driven   | 0.99           | G305A     | 10                        | 18.7                                  | -                       | 1           | -                       | -                        | -           | destabilisng  |
| data-driven   | 0.98           | G408A     | 94                        | 99.2                                  | 60.0                    | 1           | -                       | -                        | -           | stabilising   |
| data-driven   | 0.98           | A155L     | 38                        | 41.4                                  | 2.6                     | 2           | -                       | -                        | -           | destabilisng  |
| data-driven   | 0.98           | T336A     | 14                        | 101.0                                 | 12.2                    | 2           | 43.9                    | 0.7                      | 5           | neutral       |
| data-driven   | 0.98           | A183L     | 49                        | 49.6                                  | 12.3                    | 2           | -                       | -                        | -           | neutral       |
| data-driven   | 0.96           | Q180A     | 56                        | 53.0                                  | 8.6                     | 2           | -                       | -                        | -           | neutral       |
| data-driven   | 0.93           | Q246A     | 4                         | 58.2                                  | 8.2                     | 2           | 44.8                    | 0.7                      | 5           | neutral       |
| data-driven   | 0.90           | F153A     | 20                        | 83.9                                  | 8.9                     | 2           | 37.1                    | 1.6                      | 2           | destabilisng  |
| data-driven   | 0.90           | F185A     | 6                         | 51.3                                  | 5.0                     | 2           | -                       | -                        | -           | neutral       |
| data-driven   | 0.90           | G207A     | 21                        | 97.5                                  | 9.6                     | 2           | 41.3                    | 0.1                      | 2           | neutral       |
| data-driven   | 0.87           | E265A     | 5                         | 52.8                                  | 11.0                    | 2           | -                       | -                        | -           | neutral       |
| data-driven   | 0.86           | A88L      | 18                        | 68.1                                  | 11.4                    | 2           | 45.2                    | 0.5                      | 5           | neutral       |
| data-driven   | 0.81           | K263A     | 2                         | 61.8                                  | 6.5                     | 2           | 47.2                    | 1.1                      | 5           | stabilising   |
| data-driven   | 0.80           | K420A     | 33                        | 39.4                                  | 8.1                     | 2           | -                       | -                        | -           | destabilisng  |
| data-driven   | 0.80           | K356A     | 18                        | 51.6                                  | 8.3                     | 2           | -                       | -                        | -           | neutral       |
| data-driven   | 0.80           | K287A     | 45                        | 33.6                                  | 0.8                     | 2           | -                       | -                        | -           | destabilisng  |
| data-driven   | 0.78           | S406A     | 53                        | 58.8                                  | 2.8                     | 2           | -                       | -                        | -           | neutral       |
| data-driven   | 0.70           | T211A     | 46                        | 29.9                                  | 4.0                     | 2           | -                       | -                        | -           | destabilisng  |
| data-driven   | 0.69           | V148A     | 29                        | 37.2                                  | 5.2                     | 2           | -                       | -                        | -           | destabilisng  |
| data-driven   | 0.67           | F371A     | 71                        | 49.9                                  | 10.4                    | 2           | -                       | -                        | -           | neutral       |
| data-driven   | 0.67           | F403A     | 45                        | 49.5                                  | 6.9                     | 2           | -                       | -                        | -           | neutral       |
| data-driven   | 0.63           | A214L     | 12                        | 38.0                                  | 25.0                    | 2           | -                       | -                        | -           | destabilising |

<sup>a</sup> Calculated based on remaining in-gel GFP-signal after single-point temperature challenge thermostability assay.

<sup>b</sup> For  $n > 1$ : standard error of the mean (SEM) shown.

<sup>c</sup> Average  $T_m$  was calculated from individual  $T_m$  estimated for each individual repeat by fitting with a four-parameter dose-response curve (variable slope) by non-linear least-squares fitting in the python package *scipy.stats*

**Table S5.** Table of residues excluded from selection in hENT1 stabilisation

| ENT Studied | Mutation Studied                                                  | Role /Effect                                                         | Ref*    |
|-------------|-------------------------------------------------------------------|----------------------------------------------------------------------|---------|
| hENT1       | W29G,<br>W29C,<br>W29A,<br>W29Y,<br>W29V,<br>W29T                 | Altered permeant selectivity and reduced inhibitor sensitivity       | 7       |
| hENT1       | M33I,<br>M33A                                                     | Altered permeant selectivity and reduced inhibitor sensitivity       | 8, 12   |
| hENT2       | I33M, I33C                                                        | Altered permeant selectivity and increased inhibitor sensitivity     |         |
| hENT1       | I33A, I33S                                                        | Altered permeant selectivity and reduced inhibitor sensitivity       |         |
| hENT1       | N48Q                                                              | Reduced inhibitor sensitivity                                        | 13      |
| hENT1       | M89C,<br>M89T,<br>M89V                                            | Increased substrate transport and inhibitor sensitivity              | 10      |
|             | M89L,<br>M89Q                                                     | Reduced inhibitor sensitivity                                        |         |
| hENT1       | L92Q,<br>L92P                                                     | Selective reduction in substrate transport and inhibitor sensitivity | 6       |
| hENT1       | G154S                                                             | Reduced inhibitor sensitivity                                        | 11      |
| LdNT1.1     | S158C/<br>L465C                                                   | Reduced substrate transport                                          | 14      |
| hENT1       | S160C,<br>S160N                                                   | Increased substrate transport and inhibitor sensitivity              | 10      |
| LdNT1.1     | T160A                                                             | Reduced substrate transport                                          | 14      |
| LdNT1.1     | Y161A                                                             | Reduced substrate transport                                          | 14      |
| LdNT1.1     | G162A,<br>G162C/<br>S173C                                         | Reduced substrate transport                                          | 14      |
| LdNT1.1     | M163A                                                             | Increased substrate transport                                        | 14      |
| LdNT1.1     | F164A                                                             | Increased substrate transport                                        | 14      |
| LdNT1.1     | F167A                                                             | Reduced substrate transport                                          | 14      |
| LdNT1.1     | G162C/<br>S173C                                                   | Reduced substrate transport                                          | 14      |
| LdNT1.1     | T174A                                                             | Reduced substrate transport                                          | 14      |
| LdNT1.1     | M175A                                                             | Reduced substrate transport                                          | 14      |
| LdNT1.1     | M176A,<br>M176C/<br>M442C                                         | Reduced substrate transport                                          | 14      |
| hENT1       | G179L,<br>G179V,<br>G179C                                         | Reduced substrate transport and inhibitor sensitivity                | 1, 3    |
| hENT1       | G184L,<br>G184V,<br>G184C                                         | Reduced substrate transport and inhibitor sensitivity                | 3       |
| hENT1       | F209A                                                             | Reduced substrate transport                                          | 1       |
| hENT1       | P308A                                                             | Reduced substrate transport                                          | 1       |
| hENT1       | F334C,<br>F334Y,<br>F334I,<br>F334V,<br>F334S                     | Altered permeant selectivity and inhibitor sensitivity               | 5       |
| hENT1       | N338S,<br>N338C,<br>N338M,<br>N338D,<br>N338D,<br>N338Q,<br>N338A | Altered permeant selectivity and inhibitor sensitivity               | 5       |
| LdNT1.1     | M176C/<br>M442C                                                   | Reduced substrate transport                                          | 14      |
| LdNT1.1     | L444A                                                             | Reduced substrate transport                                          | 14      |
| LdNT1.1     | V445A                                                             | Reduced substrate transport                                          | 14      |
| LdNT1.1     | L446A                                                             | Increased substrate transport                                        | 14      |
| LdNT1.1     | G447C/<br>G467C                                                   | Reduced substrate transport                                          | 14      |
| LdNT1.1     | S158C/<br>L465C                                                   | Reduced substrate transport                                          | 14      |
| LdNT1.1     | M466A                                                             | Reduced substrate transport                                          | 14      |
| LdNT1.1     | G467A,<br>G447C/<br>467C                                          | Reduced substrate transport                                          | 14      |
| LdNT1.1     | I468A                                                             | Reduced substrate transport                                          | 14      |
| LdNT1.1     | S469A                                                             | Reduced substrate transport                                          | 14      |
| LdNT1.1     | I470A                                                             | Reduced substrate transport                                          | 14      |
| LdNT1.1     | L471A                                                             | Reduced substrate transport                                          | 14      |
| hENT1       | L442T,<br>L442I                                                   | Altered permeant selectivity and inhibitor sensitivity               | 1, 7, 8 |

† ENT species abbreviations: Leishmania donovani ENT (LdNT1.1); human ENT (hENT).

\* References: 1; Huang, W et al. 2017, 2; Osato, D. et al. 2003, 3; SenGupta, D. et al 2002, 4; Sundaram, M. et al 2001, 5; Visser F. et al 2007, 6; Endres, C. et al. 2004, 7; Paproski, R. et al 2008, 8; Visser F. et al 2005, 9; Aseervatham, V. et al 2015, 10; Endres, C. et al 2004, 11; Yao, S. et al. 2001, 12; Visser, F. et al. 2005, 13; Vickers, M. et al 1991, 14; Valdes, R. et al 2014

**Table S6.** Table of residues selected by IMPROvER for hPTH<sub>1</sub>R stabilisation

| Module        | IMPROvER Score | Variant   | Sequence conservation (%) | Remaining GFP-signal (%) <sup>a</sup> | Error (±%) <sup>b</sup> | repeats (n) | $T_m$ (°C) <sup>c</sup> | Error (±°C) <sup>b</sup> | repeats (n) | Comment      |
|---------------|----------------|-----------|---------------------------|---------------------------------------|-------------------------|-------------|-------------------------|--------------------------|-------------|--------------|
| n/a           | n/a            | wild-type | n/a                       | 54.0                                  | 2.2                     | 3           | 38.7                    | 0.8                      | 3           | n/a          |
| deep-sequence | 1.00           | T427M     | 2                         | 54.0                                  | 1.2                     | 3           | -                       | -                        | -           | neutral      |
| deep-sequence | 1.00           | A275K     | 4                         | 47.5                                  | 12.2                    | 3           | -                       | -                        | -           | neutral      |
| deep-sequence | 0.99           | G188Y     | 1                         | 64.6                                  | 1.0                     | 3           | 41.2                    | 0.7                      | 3           | stabilising  |
| deep-sequence | 0.99           | M189L     | 3                         | 62.3                                  | 1.4                     | 3           | 39.1                    | 0.9                      | 3           | neutral      |
| deep-sequence | 0.99           | L228V     | 13                        | 41.7                                  | 1.9                     | 3           | -                       | -                        | -           | destabilise  |
| deep-sequence | 0.98           | S356A     | 7                         | 55.4                                  | 5.7                     | 3           | -                       | -                        | -           | neutral      |
| deep-sequence | 0.98           | G188K     | 1                         | 64.0                                  | 2.1                     | 3           | 40.3                    | 1.2                      | 3           | stabilising  |
| deep-sequence | 0.98           | A274D     | 1                         | 64.6                                  | 6.3                     | 3           | 39.1                    | 0.1                      | 3           | neutral      |
| deep-sequence | 0.97           | T427L     | 2                         | 51.3                                  | 5.4                     | 3           | -                       | -                        | -           | neutral      |
| model-based   | 1.00           | S198M     | 89                        | 67.0                                  | 0.8                     | 3           | 42.1                    | 0.8                      | 3           | stabilising  |
| model-based   | 0.99           | F291T     | 38                        | 65.8                                  | 2.2                     | 3           | 40.9                    | 0.9                      | 3           | stabilising  |
| model-based   | 0.98           | D251R     | 13                        | 67.2                                  | 1.5                     | 3           | 41.7                    | 1.5                      | 3           | stabilising  |
| model-based   | 0.98           | E259P     | 3                         | 51.4                                  | 4.0                     | 3           | -                       | -                        | -           | neutral      |
| model-based   | 0.97           | E260R     | 1                         | 62.1                                  | 1.6                     | 3           | 39.7                    | 1.5                      | 3           | neutral      |
| data-driven   | 1.00           | T203A     | 14                        | 56.2                                  | 1.6                     | 3           | -                       | -                        | -           | neutral      |
| data-driven   | 0.99           | A333L     | 21                        | 66.5                                  | 0.5                     | 3           | -                       | -                        | -           | inconclusive |
| data-driven   | 0.99           | Q401A     | 11                        | 68.1                                  | 2.7                     | 3           | 40.7                    | 0.2                      | 3           | stabilising  |
| data-driven   | 0.98           | F288A     | 35                        | 72.0                                  | 3.5                     | 3           | 41.5                    | 0.7                      | 3           | stabilising  |
| data-driven   | 0.98           | E391A     | 12                        | 63.6                                  | 6.0                     | 3           | 39.4                    | 0.2                      | 3           | neutral      |
| data-driven   | 0.97           | G323A     | 13                        | 74.6                                  | 1.8                     | 3           | 41.5                    | 0.6                      | 2           | stabilising  |

<sup>a</sup> Calculated based on remaining in-gel GFP-signal after single-point temperature challenge thermostability assay.

<sup>b</sup> For  $n > 1$ : standard error of the mean (SEM) shown.

<sup>c</sup> Average  $T_m$  was calculated from individual  $T_m$  estimated for each individual repeat by fitting with a four-parameter dose-response curve (variable slope) by non-linear least-squares fitting in the python package *scipy.stats*

**Table S7.** Table of residues excluded from selection in hPTH<sub>1</sub>R stabilisation

| hPTH <sub>1</sub> R Residue | B-W ‡ | Location | Role/Effect                                                                                                                                          | Ref*    |
|-----------------------------|-------|----------|------------------------------------------------------------------------------------------------------------------------------------------------------|---------|
| Y191                        | 1.43  | TMH1     | affects peptide ligand binding and/or potency in multiple class B GPCRs                                                                              | 1       |
| Y195                        | 1.47  | TMH1     | affects peptide ligand binding and/or potency in multiple class B GPCRs                                                                              | 1       |
| H223                        | 2.50  | TMH2     | constitutively active receptor                                                                                                                       | 2       |
| M231                        | 2.58  | TMH2     | interactions with residue 19 of PTH                                                                                                                  | 3       |
| L232                        | 2.59  | TMH2     | interactions with residue 19 of PTH                                                                                                                  | 3       |
| R233                        | 2.60  | TMH2     | interactions with residue 19 of PTH - affect peptide ligand binding and/or potency in multiple class B GPCRs - polar Network conserved amongst GPCRs | 1, 3, 4 |
| A234                        | 2.61  | TMH2     | interactions with residue 19 of PTH                                                                                                                  | 3       |
| V235                        | 2.62  | TMH2     | interactions with residue 19 of PTH                                                                                                                  | 3       |
| S236                        | 2.63  | TMH2     | interactions with residue 19 of PTH                                                                                                                  | 3       |
| I237                        | 2.64  | TMH2     | interactions with residue 19 of PTH                                                                                                                  | 3       |
| F238                        | 2.65  | TMH2     | interactions with residue 19 of PTH                                                                                                                  | 3       |
| V239                        | 2.66  | TMH2     | interactions with residue 19 of PTH                                                                                                                  | 3       |
| K240                        | 2.67  | TMH2     | interactions with residue 19 of PTH - affect peptide ligand binding and/or potency in multiple class B GPCRs                                         | 1, 3    |
| D241                        | 2.68  | TMH2     | affects peptide ligand binding and/or potency in multiple class B GPCRs                                                                              | 1       |
| L244                        | 2.71  | TMH2     | affects peptide ligand binding and/or potency in multiple class B GPCRs                                                                              | 1       |
| Y245                        | 2.72  | TMH2     | affects peptide ligand binding and/or potency in multiple class B GPCRs                                                                              | 1       |
| L289                        | 3.37  | TMH3     | affects peptide ligand binding and/or potency in multiple class B GPCRs                                                                              | 1       |
| N295                        | 3.43  | TMH3     | polar Network conserved amongst GPCRs                                                                                                                | 4       |
| K359                        | 5.35  | TMH5     | affects peptide ligand binding and/or potency in multiple class B GPCRs                                                                              | 1       |
| K360                        | 5.36  | TMH5     | affects peptide ligand binding and/or potency in multiple class B GPCRs                                                                              | 1       |
| T410                        | 6.42  | TMH6     | constitutively active receptor                                                                                                                       | 2       |
| M414                        | 6.46  | TMH6     | may be involved in binding.                                                                                                                          | 5       |
| P415                        | 6.47  | TMH6     | Cross-linking                                                                                                                                        | 6       |
| H420                        | 6.52  | TMH6     | polar Network conserved amongst GPCRs                                                                                                                | 4       |
| Y421                        | 6.53  | TMH6     | affects peptide ligand binding and/or potency in multiple class B GPCRs                                                                              | 1       |
| F424                        | 6.56  | TMH6     | affects peptide ligand binding and/or potency in multiple class B GPCRs                                                                              | 1       |
| M425                        | 6.57  | TMH6     | may be involved in binding.                                                                                                                          | 5       |
| W437                        | 7.35  | TMH7     | ligand discrimination                                                                                                                                | 7       |
| Q440                        | 7.38  | TMH7     | ligand discrimination                                                                                                                                | 7       |
| M441                        | 7.39  | TMH7     | Cross-linking                                                                                                                                        | 6       |
| M445                        | 7.43  | TMH7     | affects peptide ligand binding and/or potency in multiple class B GPCRs                                                                              | 1       |
| Q451                        | 7.49  | TMH7     | polar Network conserved amongst GPCRs                                                                                                                | 4       |

‡ B-W; Ballesteros–Weinstein numbering scheme

References: 1; Hollenstein et al. (2013), 2; Schipani et al. (1997), 3; Gensure et al. (2003), 4; Liang et al. (2018), 5; Bisello et al. (1998), 6; Gensure et al. (2001), 7; Clark et al. (1998)
